# Supplementary material
Source: PubMed Central journal article supplement (PMC7112150)
Supplement: supp_RA119000509_156861_1_supp_445987_q2pbyq.pdf [file supp_RA119000509_156861_1_supp_445987_q2pbyq.pdf]

**Supplementary Information:**

**HDL inhibits ER stress-induced apoptosis of pancreatic  $\beta$ -cells by activation of Smoothed**

*Mustafa Yalcinkaya<sup>1</sup>, Anja Kerksiek<sup>2</sup>, Katrin Gebert<sup>1</sup>, Wijtske Annema<sup>1</sup>, Rahel Sibler<sup>1</sup>, Silvija Radosavljevic<sup>1</sup>, Dieter Lütjohann<sup>2</sup>, Lucia Rohrer<sup>1</sup> and Arnold von Eckardstein<sup>1§</sup>.*

1. Institute of Clinical Chemistry, University and University Hospital of Zurich, Switzerland;
2. Institute of Clinical Chemistry and Clinical Pharmacology, University Hospital Bonn, Bonn, Germany;

**Supplementary Table S1**

| <b>Sterols and oxysterols</b>                            | <b>Samples</b> |            |            |            |
|----------------------------------------------------------|----------------|------------|------------|------------|
|                                                          | HDL donor1     | HDL donor2 | LDL donor1 | LDL donor2 |
| Lanosterol [ $\mu\text{g}/\text{mg}$ ]                   | 0.37           | 0.52       | 1.48       | 2.72       |
| Lathosterol [ $\mu\text{g}/\text{mg}$ ]                  | 2.18           | 2.83       | 10.62      | 21.66      |
| Desmosterol [ $\mu\text{g}/\text{mg}$ ]                  | 2.47           | 1.86       | 7.86       | 10.21      |
| Cholestanol [ $\mu\text{g}/\text{mg}$ ]                  | 4.70           | 2.69       | 12.81      | 10.95      |
| Cholesterol [ $\text{mg}/\text{mg}$ ]                    | 2.82           | 1.67       | 10.32      | 9.89       |
| 7 $\alpha$ -hydroxycholesterol [ $\text{ng}/\text{mg}$ ] | 8.36           | 8.69       | 68.32      | 92.32      |
| 7 $\beta$ -hydroxycholesterol [ $\text{ng}/\text{mg}$ ]  | 3.80           | 2.31       | 17.27      | 10.20      |
| 24-hydroxycholesterol [ $\text{ng}/\text{mg}$ ]          | 10.12          | 12.1       | 30.93      | 41.04      |
| 25-hydroxycholesterol [ $\text{ng}/\text{mg}$ ]          | 0.49           | 0.38       | 3.64       | 3.25       |
| 27-hydroxycholesterol [ $\text{ng}/\text{mg}$ ]          | 40.43          | 25.23      | 81.05      | 79.28      |

**Supplementary Table S1: Concentrations of sterols in HDL and LDL.** Sterols were quantified by gas chromatography coupled with mass spectrometry (GC-MS) as described in the methods section. Data represent mass concentrations of each lipid relative mass concentrations of total protein in each lipoprotein.

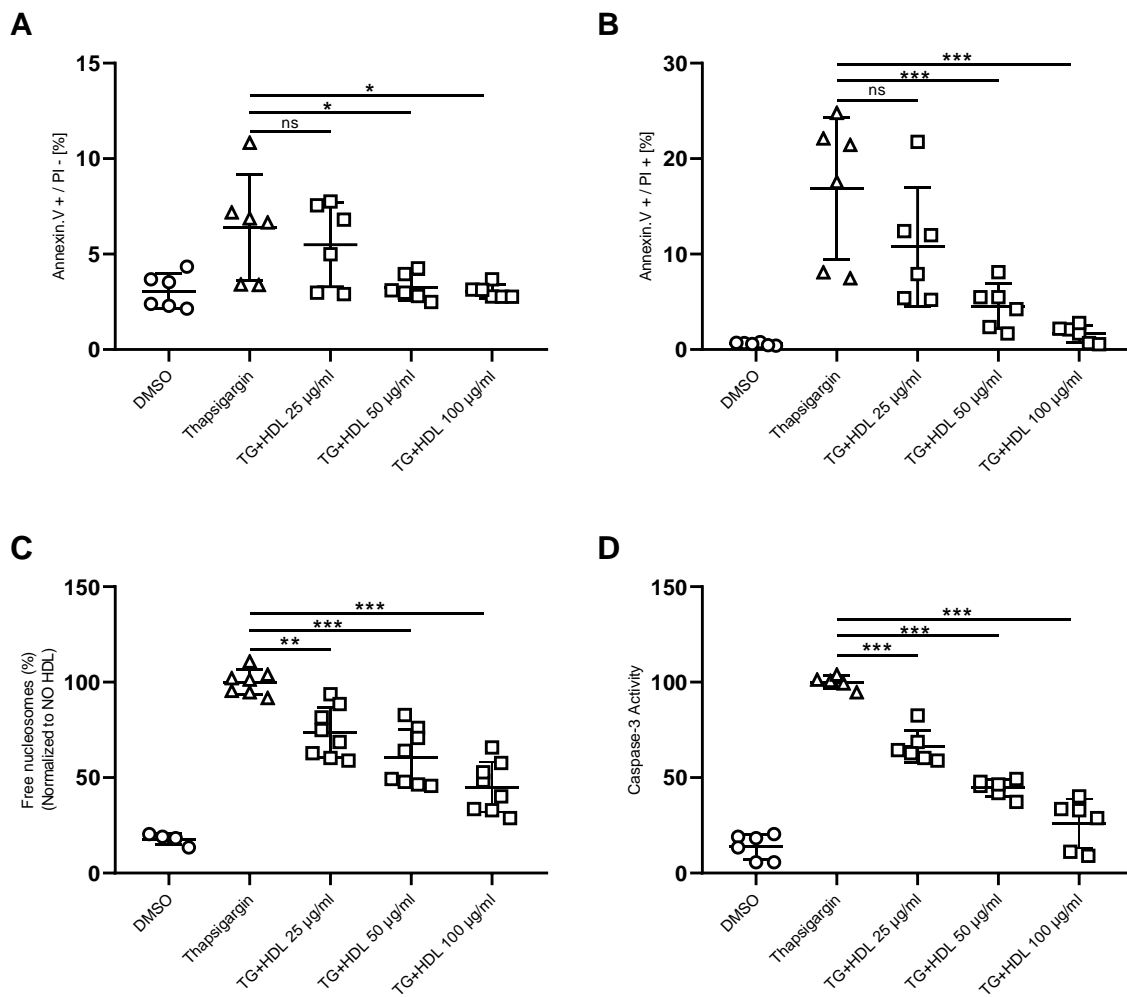

**Supplemental Figure S1: HDL inhibits TG-induced apoptosis dose dependently.** INS1e cells were treated with 50 nM TG for 16h in the presence or absence of 25, 50 or 100 µg/ml native HDL. Cell death was recorded by Annexin V/PI staining via flow cytometry (**A**, **B**) or measuring free nucleosomes (**C**) or Caspase-3 activity (**D**). Early and late apoptosis were defined as Annexin V+/PI- cells (**A**) and Annexin V+/PI+ (**B**), respectively. Data are presented as mean ± SD of 3 independent experiments, which were analyzed by one-way ANOVA coupled with Tukey's test for multiple comparisons. \*\*\*P≤ 0.001, \*\*P≤ 0.01, \*P≤ 0.05

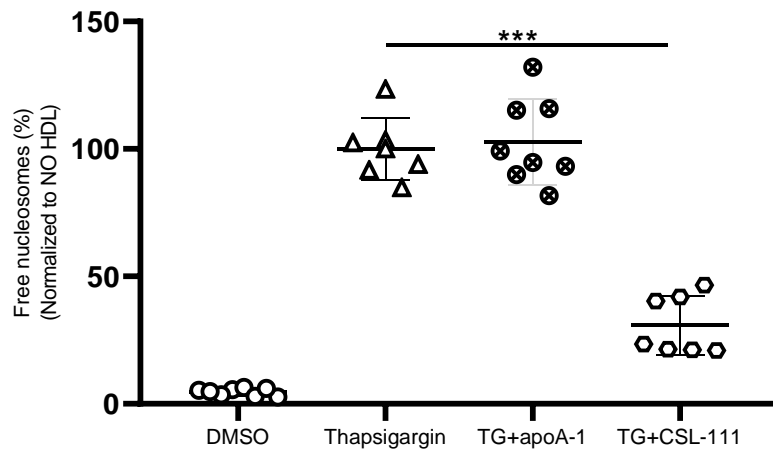

**Supplemental Figure S2: Lipid-free apoA-1 does not inhibit TG-induced apoptosis.** INS1e cells were treated with 100 nM TG for 4h in the presence or absence of 25  $\mu$ g/ml lipid-free apoA1 or CSL-111. The cell death was recorded by using the free nucleosomes assay. Data are represented as mean  $\pm$  SD of 3 independent experiments, which were analyzed by one-way ANOVA coupled with Tukey's test for multiple comparisons. \*\*\* $P \leq 0.001$ , \*\* $P \leq 0.01$ , \* $P \leq 0.05$

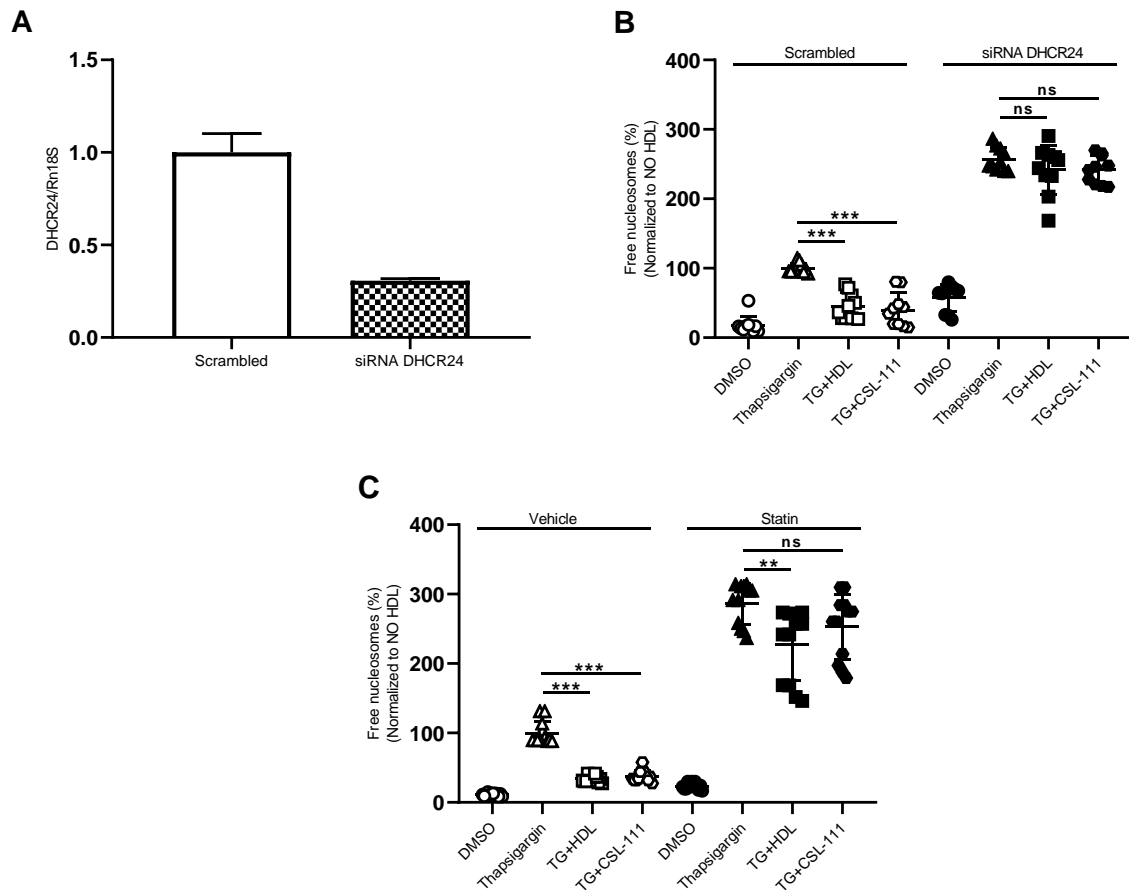

**Supplemental Figure S3: The anti-apoptotic activity of HDL is abrogated by interference with cholesterol synthesis.** INS1e cells were transfected with specific siRNA against DHCR24 or with non-silencing siRNA (Scrambled). After 48 hours of transfection, DHCR24 mRNA expression was measured by qPCR and normalized to Rn18S (A). The cells were treated with 100 nM TG and incubated with native HDL or CSL-111 for 4h (B). INS1e cells were pre-treated with 1  $\mu$ M Atorvastatin for 16 hours and with 100 nM in presence and absence of HDL or CSL-111 for 4h (C). The cell death was recorded by using the free nucleosomes assay (B-C). Data shown in figures B and C, each represent mean  $\pm$  SD of 3 independent experiments, which were analyzed by one-way ANOVA coupled with Tukey's test for multiple comparisons. \*\*\* $P \leq 0.001$ , \*\* $P \leq 0.01$ , \* $P \leq 0.05$

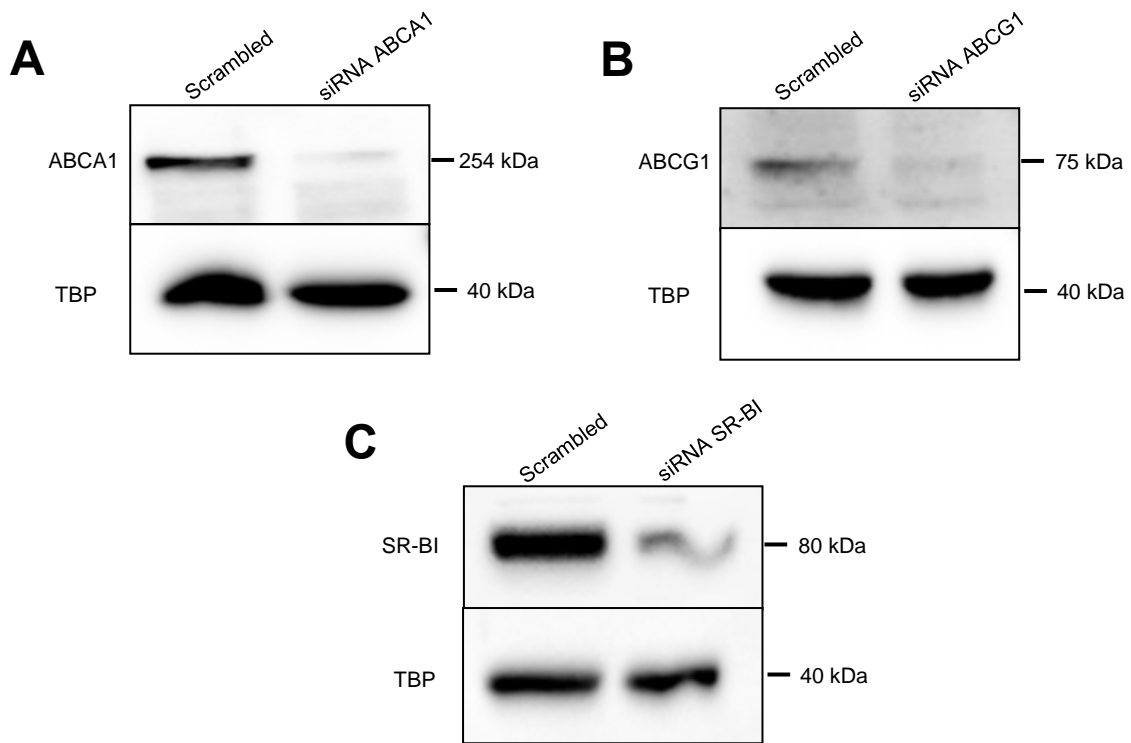

**Supplemental Figure S4: Efficiency of RNA interference with ABCA1, ABCG1, or SR-BI.** INS1e cells were transfected with specific siRNA against ABCA1 (**A**), ABCG1 (**B**), SR-BI (**C**) or with non-silencing siRNA (Scrambled) for 48h. TATA-binding protein (TBP) was used as a loading control. Representative western blots are shown.

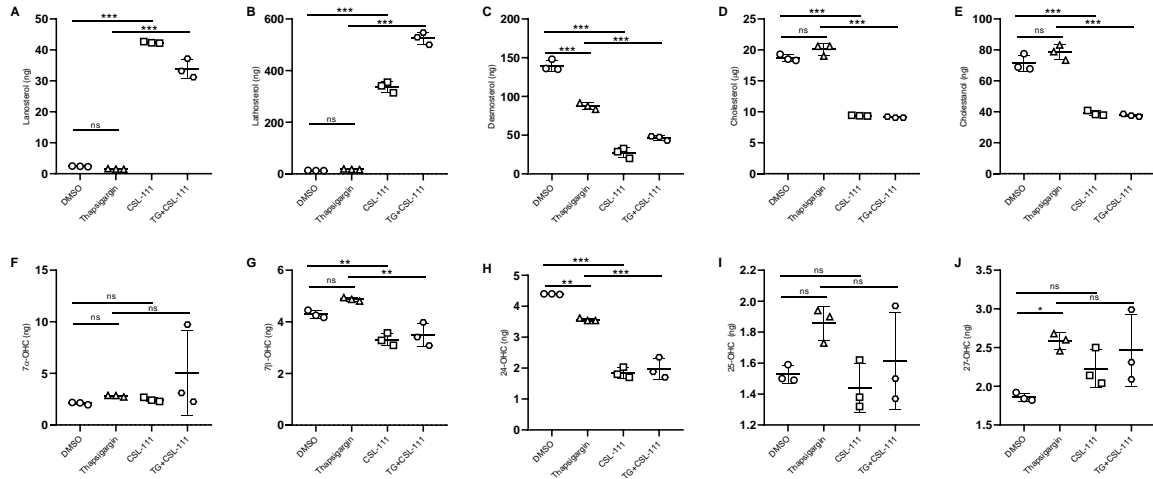

**Supplemental Figure S5: Effects of ER stress and HDL on the sterol content of INS1e cells.** INS1e cells were treated with 50 nM TG in presence and absence of CSL-111 for 16h and sterols were measured by mass spectrometry from cell pellets. Sterols amounts were normalized to dry pellet amounts. Lanosterol (**A**), lathosterol (**B**), desmosterol (**C**), cholesterol (**D**), cholestanol (**E**), 7 $\alpha$ -hydroxycholesterol (**F**), 7 $\beta$ -hydroxycholesterol (**G**), 24-hydroxycholesterol (**H**), 25-hydroxycholesterol (**I**) and 27-hydroxycholesterol (**J**). Data represent means  $\pm$  S.D. of a triplicate experiment and were analyzed by one-way ANOVA coupled with Tukey's test for multiple comparisons. \*\*\* $P \leq 0.001$ , \*\* $P \leq 0.01$ , \* $P \leq 0.05$

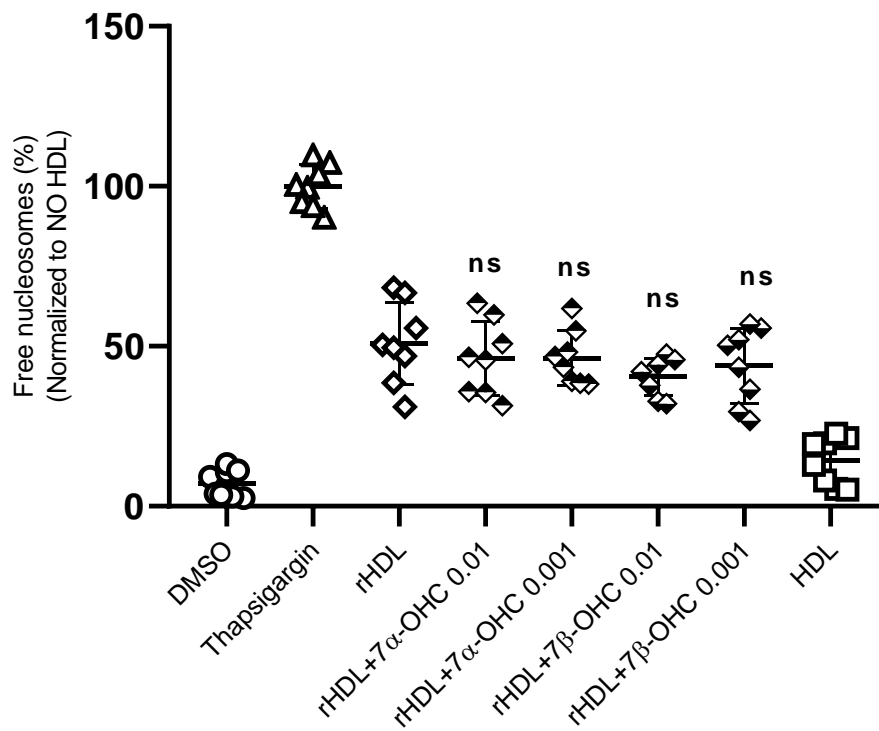

**Supplemental Figure S6: Supplementation with 7 $\alpha$ -hydroxycholesterol (OHC) or 7 $\beta$ -OHC does not enhance apoptosis inhibition by rHDL.** rHDL were supplemented with 7 $\alpha$ -OHC or 7 $\beta$ -OHC at molar ratios 0.01 or 0.001 relative to apoA-I. INS1e cells were treated with 100 nM TG and incubated with rHDL-/+ oxysterols for 4h. Cell death was recorded by using the free nucleosomes assay. Data are presented as mean  $\pm$  SD of 3 independent experiments, which were analyzed by one-way ANOVA coupled with Tukey's test for multiple comparisons of rHDL-/+ oxysterols against rHDL.



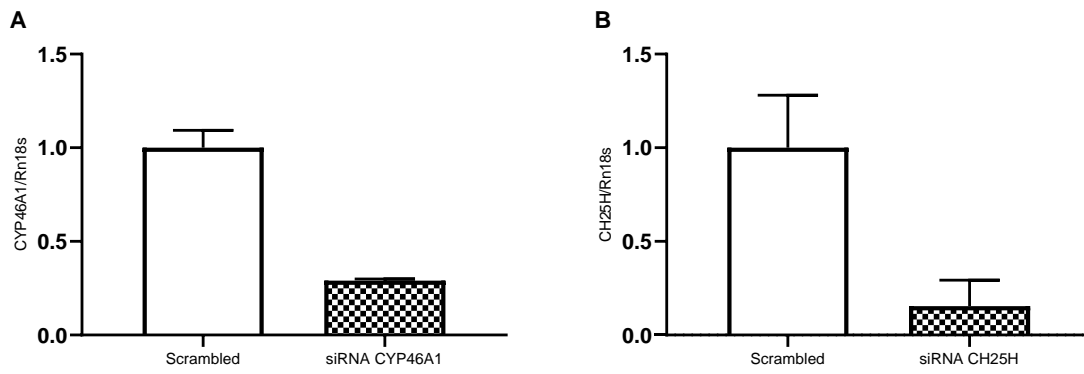

**Supplemental Figure S7: Efficiency of RNA interference with CYP46A1 and CH25H.** INS1e cells were transfected with specific siRNA against *CYP46A1* (A), *CH25H* (B), or with non-silencing siRNA (Scrambled) for 48h. mRNA expressions was normalized to Rn18S.

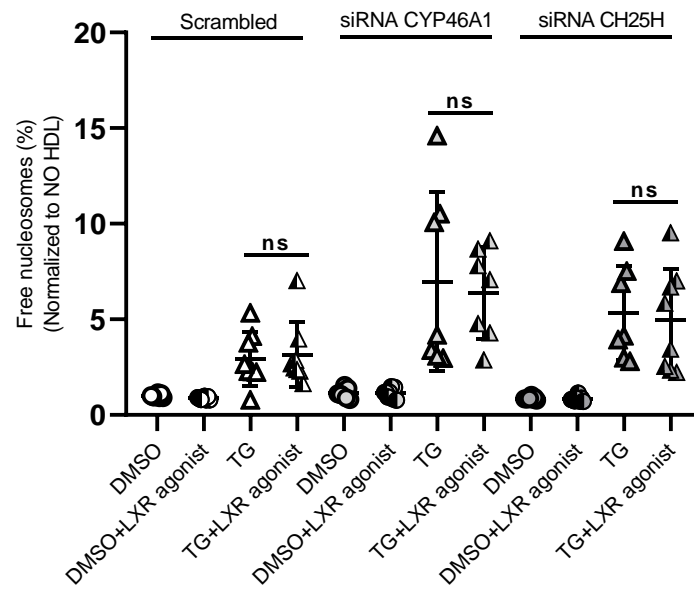

**Supplemental Figure S8: LXR activation does not rescue CYP silencing induced cell death.** INS1e cells were transfected with specific siRNA against *CYP46A1*, *CH25* or with non-silencing siRNA (Scrambled). After 48 hours of transfection, the cells were treated with 1  $\mu$ M LXR agonist T0901317 for 16h and then 100 nM TG for 4h. The cell death was recorded with the free nucleosomes assay. Data are presented as mean  $\pm$  SD of 3 independent experiments, which were analyzed by one-way ANOVA coupled with Tukey's test for multiple comparisons in group of Scrambled and knockdown conditions, respectively.

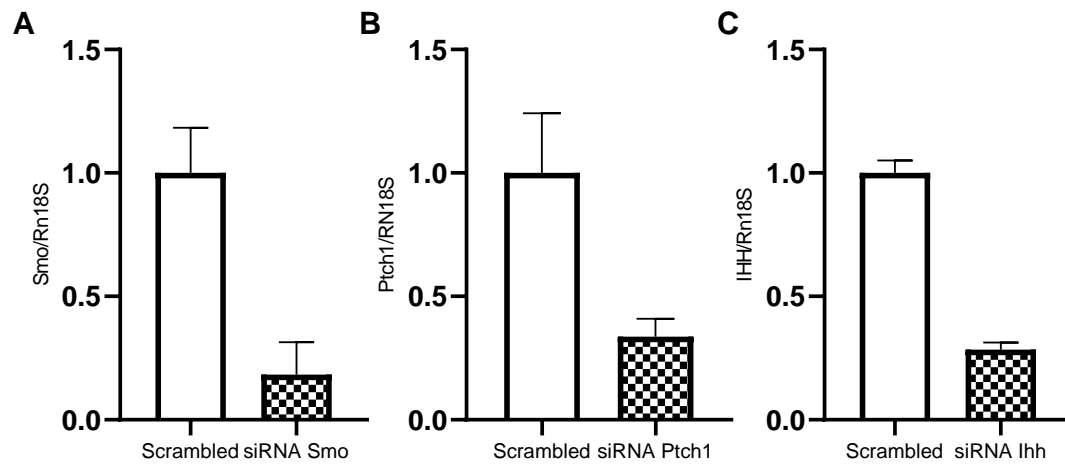

**Supplemental Figure S9: Efficiency of RNA interference with *Smo*, *Ptch1* and *Ihh*.** INS1e cells were transfected with specific siRNA against *Smo* (A), *Ptch1* (B), *Ihh* (C) or with non-silencing siRNA (Scrambled) for 48 h. mRNA expression was normalized to Rn18S.

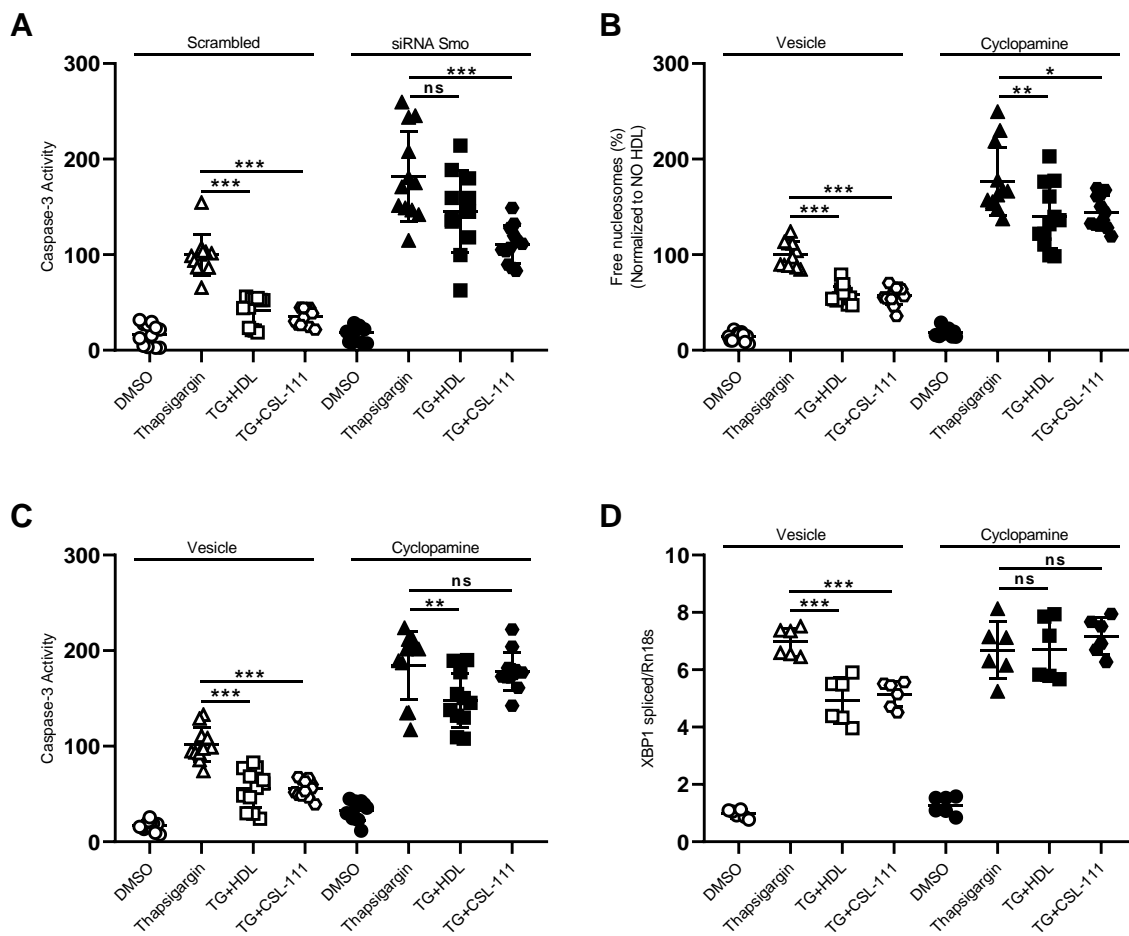

**Supplemental Figure S10: Anti-apoptotic effects of HDL depend on Smoothed.** INS1E cells were transfected with specific siRNA against *Smo* and non-silencing siRNA (Scrambled) (**A**) or pre-treated with Cyclophamide for 30 min (**B-D**). After 48 hours of transfection or Cyclophamide treatment, the cells were treated with 100 nM TG and incubated with HDL or CSL-111 for 4h. Cell death was recorded by using the free nucleosomes assay (**A-B**) or the Caspase-3 assay (**C**). XBP1 splicing was measured by qPCR (**D**). Data are represented as mean  $\pm$  SD of 3 independent experiments, which were analyzed by one-way ANOVA coupled with Tukey's test for multiple comparisons in group of Scrambled and knockdown conditions (**A**) or in group of vesicle or Cyclophamide conditions (**C-D**), respectively. \*\*\* $P \leq 0.001$ , \*\* $P \leq 0.01$ , \* $P < 0.05$

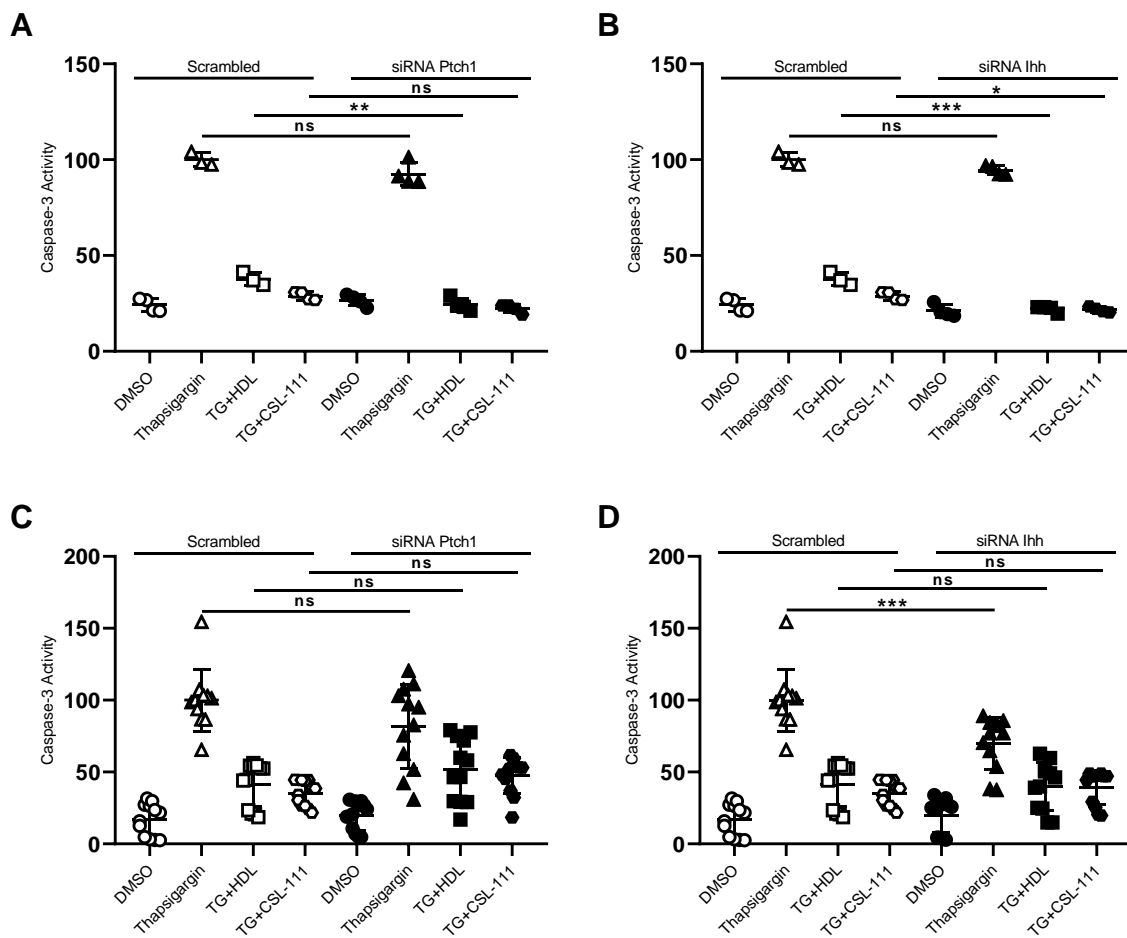

**Supplementary figure 11: Anti-apoptotic effects of HDL are independent of Patched1 (*Ptch1*) and Indian Hedgehog (*IHH*).** INS1e cells were transfected with specific siRNA against *Ptch1* (**A**, **C**), *Ihh* (**B**, **D**) or non-silencing siRNA (Scrambled). After 48 hours of transfection, the cells were treated with 100 nM TG for 16 h (**A**, **B**) or 50 nM TG for 4h (**C**, **D**) in absence or presence of HDL or CSL-111. Cell death was recorded via caspase-3 activity assay. Data are represented as mean  $\pm$  SD, which were analyzed by one-way ANOVA coupled with Tukey's test for multiple comparisons. \*\*\* $P \leq 0.001$ , \*\* $P \leq 0.01$ , \* $P \leq 0.05$

## Supplementary Electrophoretic Blot A

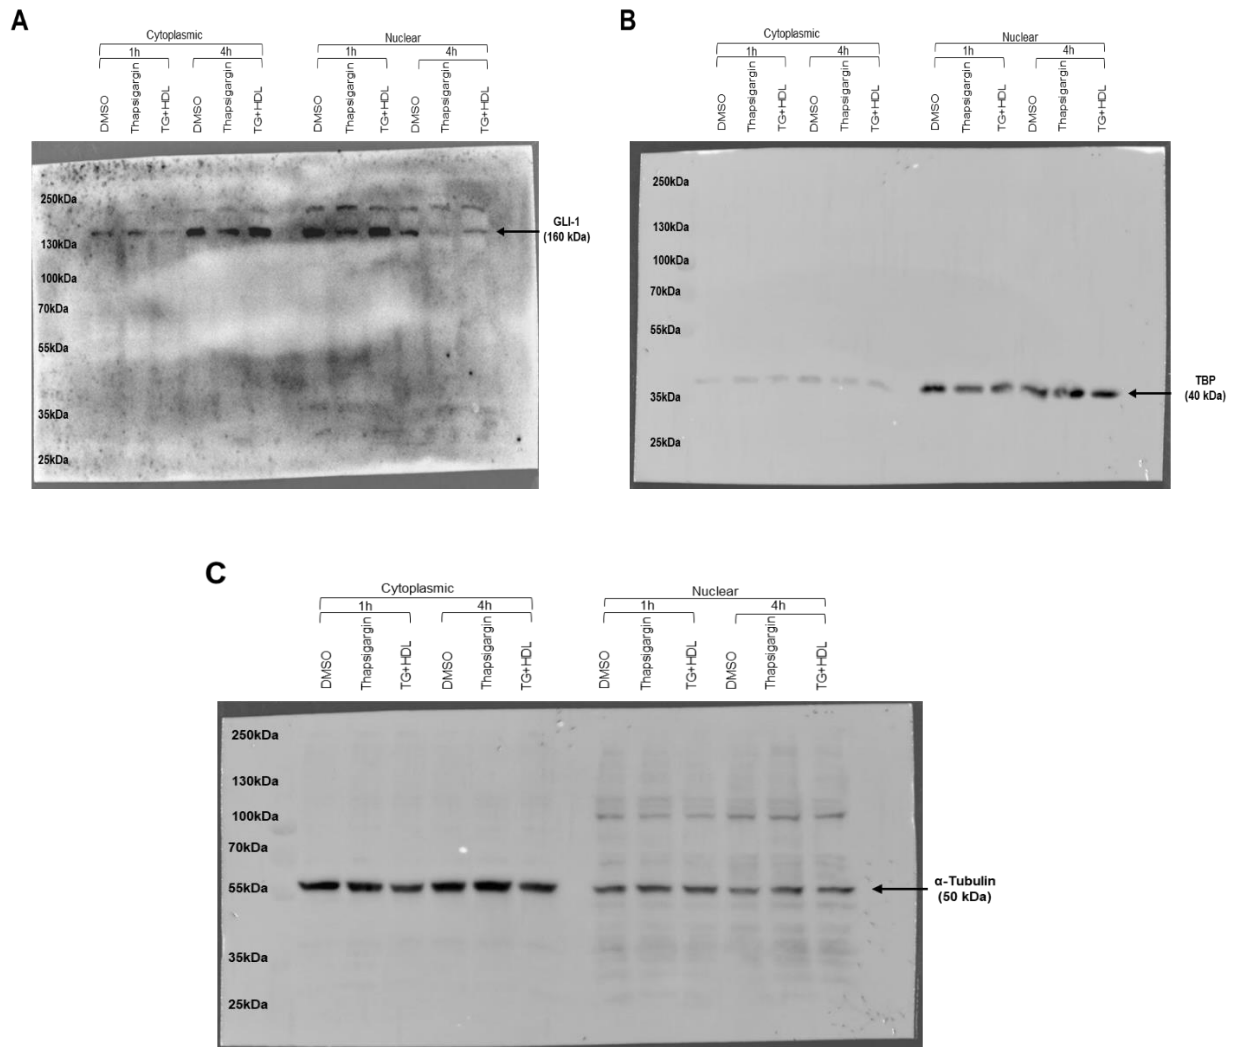

**Supplementary Electrophoretic Blot A: Corresponds to the blot shown in Figure 10A.** Western blots were probed with anti-GLI-1 (160 kDa) (**A**), anti-TATA binding protein (TBP, 40kDa) (**B**), or anti- $\alpha$ -Tubulin (50kDa) (**C**).

## Supplementary Electrophoretic Blot B

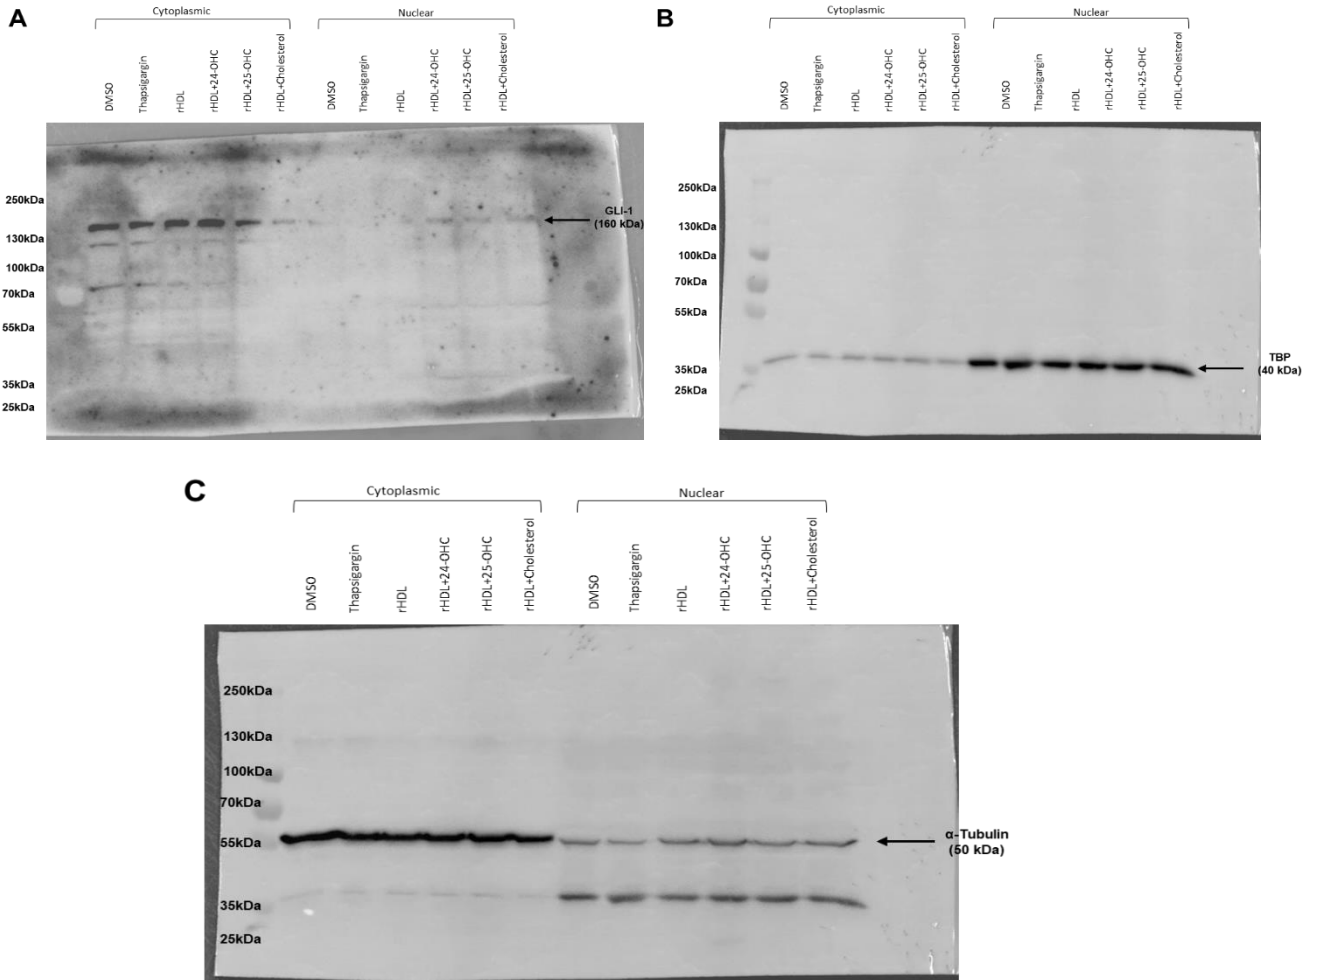

**Supplementary Electrophoretic Blot B: Corresponds to the blot shown in Figure 10B.** Western blots were probed with anti-GLI-1 (160 kDa) (A), anti-TATA binding protein (TBP, 40kDa) (B) or anti- $\alpha$ -Tubulin (50kDa) (C).

## Supplementary Electrophoretic Blot C

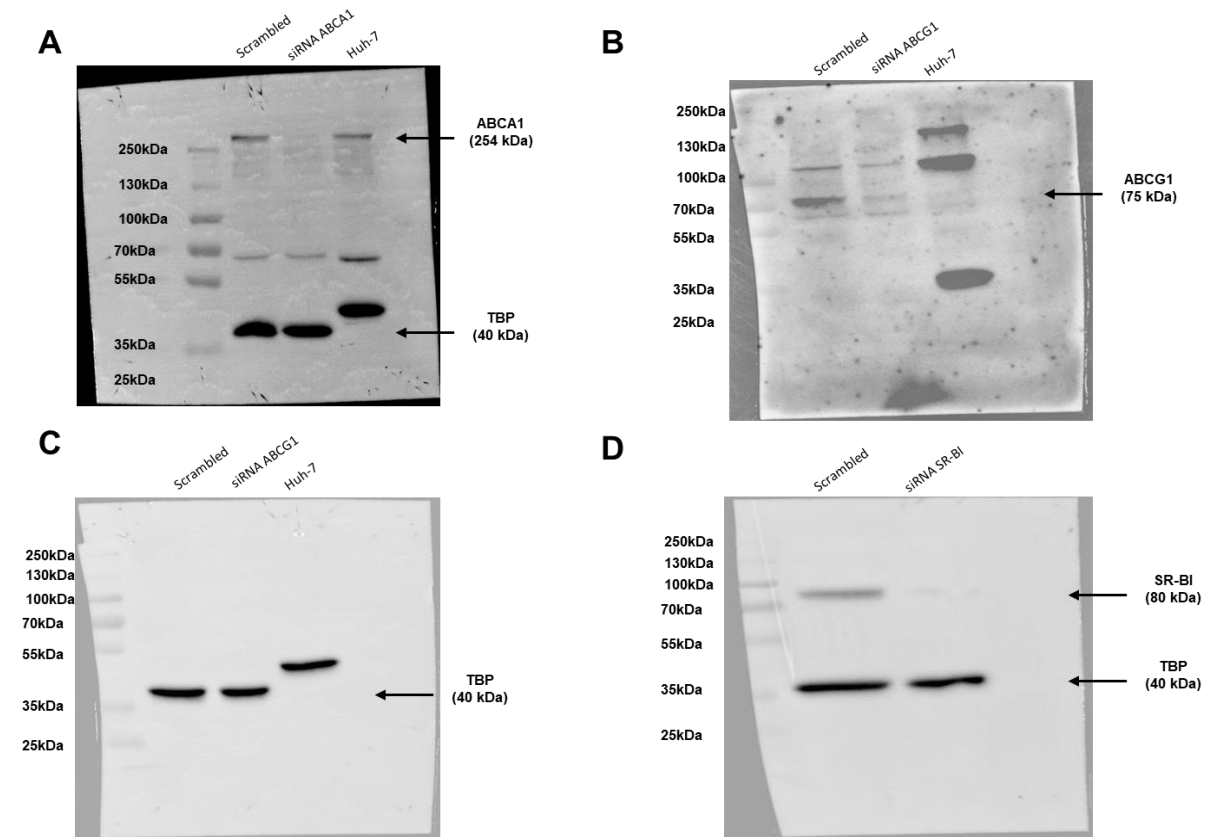

**Supplementary Electrophoretic Blot C: Corresponds to the blots shown in Supplementary Figure S4.** Western blot in supplementary Figure S4A was probed with anti-ABCA1 (254 kDa) and anti-TATA binding protein (TBP 40 kDa) (**A**) Western blot in supplementary figure S4B was probed with anti-ABCG1 (75 kDa) (**B**) Western blot in supplementary figure S4B was probed with anti-TATA binding protein (TBP 40 kDa) (**C**). Western blot in supplementary figure S4C was probed with anti-SR-BI (80 kDa) and anti-TATA binding protein (TBP 40 kDa) (**D**)
